# Supplementary material for: Efficient pretreatment using dimethyl isosorbide as a biobased solvent for potential complete biomass valorization
Source: Royal Society of Chemistry journal article supplement (doi:10.1039/d2gc00409g), 2022-01-01
Supplement: d2gc00409g1.pdf [file d2gc00409g1.pdf]

# Efficient pretreatment using dimethyl isosorbide as a biobased solvent for potential complete biomass valorization

Shuang Yang,<sup>a,b,c</sup> Xianpeng Yang,<sup>b,c</sup> Xianzhi Meng<sup>d</sup> and Lei Wang<sup>\*b,c</sup>

<sup>a</sup> College of Environmental and Resource Sciences, Zhejiang University, Hangzhou, 310058, Zhejiang Province, China

<sup>b</sup> Key Laboratory of Coastal Environment and Resources of Zhejiang Province, School of Engineering, Westlake University, 18 Shilongshan Road, Hangzhou, 310024, Zhejiang Province, China

<sup>c</sup> Institute of Advanced Technology, Westlake Institute for Advanced Study, 18 Shilongshan Road, Hangzhou, 310024, Zhejiang Province, China

<sup>d</sup> Department of Chemical & Biomolecular Engineering, University of Tennessee Knoxville, Knoxville, TN 37996, USA

## 1. Hansen solubility of cosolvents

Hansen solubility parameters (HSP) have been successfully used as a decision-making tool to select solvents for extraction purposes.<sup>1</sup> Hansen solubility parameters of DMI/H<sub>2</sub>O mixture were calculated to clarify the solvent power dissociating the lignin. Solubility parameters ( $\delta$ ) indicates the degree of dispersion forces, permanent dipole–permanent dipole forces, and hydrogen bonding hold to molecules of the liquid. It can be calculated as follows:<sup>2</sup>

$$\delta^2 = \delta_D^2 + \delta_P^2 + \delta_H^2 \quad (1)$$

$$\delta_{mixture} = \sum_{i=1}^n \delta_i V_i \quad (2)$$

where  $\delta_D$ ,  $\delta_P$  and  $\delta_H$  are the dispersion force parameter, polar force parameter, and hydrogen force parameter, respectively.  $\delta_{mixture}$  is the solubility parameter of DMI and H<sub>2</sub>O cosolvent with different ratio.  $\delta_i$  and  $V_i$  are the solubility parameter and volume ratio of a solvent that is a part (DMI or H<sub>2</sub>O) of the mixture, respectively.

The ability of DMI/H<sub>2</sub>O cosolvent to dissolve lignin, RED (relative energy difference), can be predicted by the following equation:

$$(R_a)^2 = 4 \cdot (\delta_{D2} - \delta_{D1})^2 + (\delta_{P2} - \delta_{P1})^2 + (\delta_{H2} - \delta_{H1})^2 \quad (3)$$

$$RED = R_a/R_0 \quad (4)$$

where  $R_0$  is a constant related to lignin ( $R_0 = 13.7$ ).<sup>3</sup>  $R_a$  is defined by equation 3. “2” and “1” refer to the cosolvent and lignin ( $\delta_{D1} = 21.9$  MPa,  $\delta_{P1} = 14.1$  MPa, and  $\delta_{H1} = 16.9$  MPa), respectively. According to Ribeiro’s research, 30% lignin solubility threshold is more accurate.<sup>4</sup> Hansen solubility parameters of DMI/H<sub>2</sub>O at various ratios were show as table S2.

Based on Hansen solubility theory,<sup>5</sup> if  $R_a$  is less than  $R_0$  ( $RED = R_a/R_0 < 1$ ), lignin can be dissolved in the solvent. Smaller RED numbers indicate higher affinity between the cosolvent and the lignin, indicating a higher degree of dissolution of lignin in the cosolvent.<sup>6</sup> From table S2, the

calculation results show that the RED numbers are all less than 1 when the water content is less than or equal to 40% in DMI/H<sub>2</sub>O cosolvent, which means the DMI/H<sub>2</sub>O (10:0~6:4) cosolvent can dissolve lignin. Meanwhile, the RED number of 10:0 (0.89) is similar to 6:4 (0.90), and the RED number of 9:1 (0.77) is same with 7:3 (0.77). Taking energy consumption of DMI recycling into consideration, low proportion of water in the solvent system is expected. So, DMI:H<sub>2</sub>O is 10:0, 9:1 and 8:2 were chosen for further exploring in this work.

## 2. Tables and Figures

Table S1 Hansen and Hildebrand solubility parameters of DMI/H<sub>2</sub>O at various ratios

| DMI:H <sub>2</sub> O | $\delta_T$ (MPa) | $\delta_D$ (MPa) | $\delta_P$ (MPa) | $\delta_H$ (MPa) | Ra   | Ra/R <sub>0</sub> |
|----------------------|------------------|------------------|------------------|------------------|------|-------------------|
| <b>10:0</b>          | 20.4             | 17.6             | 7.1              | 7.5              | 12.2 | <b>0.89</b>       |
| <b>9:1</b>           | 22.1             | 17.4             | 8.0              | 11.0             | 10.5 | <b>0.77</b>       |
| <b>8:2</b>           | 24.1             | 17.2             | 8.9              | 14.5             | 9.9  | <b>0.72</b>       |
| 7:3                  | 26.6             | 17.0             | 9.8              | 17.9             | 10.6 | 0.77              |
| 6:4                  | 29.2             | 16.8             | 10.7             | 21.4             | 12.3 | 0.90              |
| 5:5                  | 32.1             | 16.6             | 11.6             | 24.9             | 14.7 | 1.08              |
| 4:6                  | 35.0             | 16.3             | 12.4             | 28.4             | 17.6 | 1.28              |
| 3:7                  | 38.1             | 16.1             | 13.3             | 31.9             | 20.7 | 1.51              |
| 2:8                  | 41.3             | 15.9             | 14.2             | 35.3             | 23.9 | 1.75              |
| 1:9                  | 44.5             | 15.7             | 15.1             | 38.8             | 27.2 | 1.99              |
| 0:10                 | 47.8             | 15.5             | 16.0             | 42.3             | 30.6 | 2.24              |

Table S2 Comparison of pulp yield, lignin yield and lignin removal efficiency at 100 °C and 120 °C

| □           | Temperature | Pulp yield | Lignin yield | Lignin removal efficiency |
|-------------|-------------|------------|--------------|---------------------------|
| 20 min_10:0 | 100 °C      | 76.2%      | 5.1%         | 36.9%                     |
| 60 min_10:0 |             | 67.5%      | 15.6%        | 52.2%                     |
| 20 min_10:0 | 120 °C      | 56.6%      | 32.9%        | 71.5%                     |
| 60 min_10:0 |             | 50.7%      | 43.8%        | 79.4%                     |

Table S3 Composition of original and pretreated substrates, pulp yield, lignin yield and lignin removal efficiency at various conditions

| □ | Pulp composition |       |       |      |       |      | Pulp yield | Lignin yield | Lignin removal efficiency | Cellulose retention |       |
|---|------------------|-------|-------|------|-------|------|------------|--------------|---------------------------|---------------------|-------|
|   | Glu              | XY    | GM    | AG   | ASL   | AIL  |            |              |                           |                     |       |
| □ | Eucalyptus       | 50.2% | 12.9% | 1.9% | 1.25% | 2.9% | 28.2%      | 100%         | -                         | -                   | 100%  |
|   | 20 min_10:0      | 75.5% | 7.6%  | 1.3% | 0.5%  | 1.5% | 14.2%      | 56.6%        | 32.9%                     | 71.5%               | 85.0% |
|   | 60 min_10:0      | 81.6% | 4.4%  | 0.8% | 0.3%  | 1.3% | 11.3%      | 50.7%        | 43.8%                     | 79.4%               | 82.4% |
|   | 20 min_9:1       | 81.5% | 0.80% | 0.3% | -     | 1.5% | 15.9%      | 53.9%        | 32.9%                     | 69.8%               | 87.5% |
|   | 60 min_9:1       | 92.7% | 0.40% | 0.2% | -     | 0.9% | 5.9%       | 42.0%        | 50.6%                     | 91.2%               | 77.5% |
|   | 20 min_8:2       | 64.6% | 6.9%  | 1.5% | 0.3%  | 1.7% | 24.9%      | 69.7%        | 12.7%                     | 40.6%               | 89.7% |
|   | 60 min_8:2       | 77.5% | 4.3%  | 1.4% | -     | 1.1% | 15.6%      | 53.7%        | 38.8%                     | 71.3%               | 82.8% |

Note:

<sup>a</sup> Reaction condition: 1.5 g substrate in 15 ml cosolvent, 120 °C 6 h;

<sup>b</sup> Glu: glucan, XY: xylan, GM: glucomannan, AG: arabinogalactan, ASL: acid soluble lignin, AIL:

acid insoluble lignin;

C-: not detected.

Table S4 Assignments ( $^{13}\text{C}$ - $^1\text{H}$  Cross signals) of major components in the HSQC spectra of lignin

| Label             | $\delta_{\text{C}}/\delta_{\text{H}}$ (ppm) | Assignments                                                                 |
|-------------------|---------------------------------------------|-----------------------------------------------------------------------------|
| C $_{\beta}$      | 52.4/3.45                                   | C $_{\beta}$ -H $_{\beta}$ in phenylcoumaran substructures (C)              |
| B $_{\beta}$      | 53.5/3.05                                   | C $_{\beta}$ -H $_{\beta}$ in $\beta$ - $\beta$ (resinol) substructures (B) |
| -OCH $_3$         | 55.7/3.65                                   | C-H in methoxyls                                                            |
| A $_{\gamma}$     | 59.5/3.64                                   | C $_{\gamma}$ -H $_{\gamma}$ in $\beta$ -O-4 substructures (A)              |
| A' $_{\gamma}$    | 63.0/4.30                                   | C $_{\gamma}$ -H $_{\gamma}$ in $\gamma$ -acylated $\beta$ -O-4 (A')        |
| C' $_{\gamma}$    | 62.3/3.70                                   | C $_{\gamma}$ -H $_{\gamma}$ in phenylcoumaran substructures (C)            |
| I $_{\gamma}$     | 61.2/4.10                                   | C $_{\gamma}$ -H $_{\gamma}$ in cinnamyl alcohol end-groups (I)             |
| HKs               | 67.0/4.2                                    | Hibbert ketones                                                             |
| B $_{\gamma}$     | 71.0/3.79-4.16                              | C $_{\gamma}$ -H $_{\gamma}$ in $\beta$ - $\beta$ resinol substructures (B) |
| A $_{\alpha}$     | 71.6/4.83                                   | C $_{\alpha}$ -H $_{\alpha}$ in $\beta$ -O-4 linked to a S units (A)        |
| A' $_{\beta}$ (G) | 80.8/4.62                                   | C $_{\beta}$ -H $_{\beta}$ in $\beta$ -O-4 linked to G (A')                 |
| A $_{\beta}$ (G)  | 83.9/4.30                                   | C $_{\beta}$ -H $_{\beta}$ in $\beta$ -O-4 linked to G units (A)            |
| A' $_{\beta}$ (S) | 83.9/4.30                                   | C $_{\beta}$ -H $_{\beta}$ in $\beta$ -O-4 linked to S units (A')           |
| B $_{\alpha}$     | 84.9/4.64                                   | C $_{\alpha}$ -H $_{\alpha}$ in $\beta$ - $\beta$ resinol substructures (B) |
| A $_{\beta}$ (S)  | 85.9/4.11                                   | C $_{\beta}$ -H $_{\beta}$ in $\beta$ -O-4 linked to a S units (A)          |
| C $_{\alpha}$     | 86.8/5.48                                   | C $_{\alpha}$ -H $_{\alpha}$ in phenylcoumaran substructures (C)            |
| S $_{2,6}$        | 104.0/6.72                                  | C $_{2,6}$ -H $_{2,6}$ in syringyl units (S)                                |
| S' $_{2,6}$       | 106.3/7.21                                  | C $_{2,6}$ -H $_{2,6}$ in oxidized S units (S')                             |
| G $_2$            | 111.0/6.99                                  | C $_2$ -H $_2$ in guaiacyl units (G)                                        |
| G $_5$            | 114.8/6.68                                  | C $_5$ -H $_5$ in guaiacyl units (G)                                        |
| G $_{5e}$         | 115.1/6.95                                  | C $_5$ -H $_5$ in etherified guaiacyl units (G)                             |
| G $_6$            | 119.1/6.80                                  | C $_6$ -H $_6$ in guaiacyl units (G)                                        |

Table S5 CrI and DP of original and the pretreated substrates under different conditions

|             | CrI (%) | Crystallite size (nm) | DP               |
|-------------|---------|-----------------------|------------------|
| Eucalyptus  | 72.6%   | 3.27                  | 2310 $\pm$ 14.22 |
| 20 min_10:0 | 74.3%   | 3.28                  | 1522 $\pm$ 6.23  |
| 60 min_10:0 | 73.8%   | 3.29                  | 1144 $\pm$ 10.62 |
| 20 min_9:1  | 77.8%   | 3.57                  | 1506 $\pm$ 1.90  |
| 60 min_9:1  | 79.5%   | 3.72                  | 823 $\pm$ 1.09   |
| 20 min_8:2  | 75.7%   | 3.41                  | 1933 $\pm$ 1.52  |
| 60 min_8:2  | 78.3%   | 3.62                  | 1478 $\pm$ 2.86  |

Table S6 Pulp yield, lignin yield and lignin removal efficiency after one recycling cycle

| $\square$ | Pulp yield | Lignin yield | Lignin removal efficiency |
|-----------|------------|--------------|---------------------------|
|-----------|------------|--------------|---------------------------|

60 min 9:1

48.1% ± 0.29%

48.9% ± 0.50%

84.4% ± 0.77%

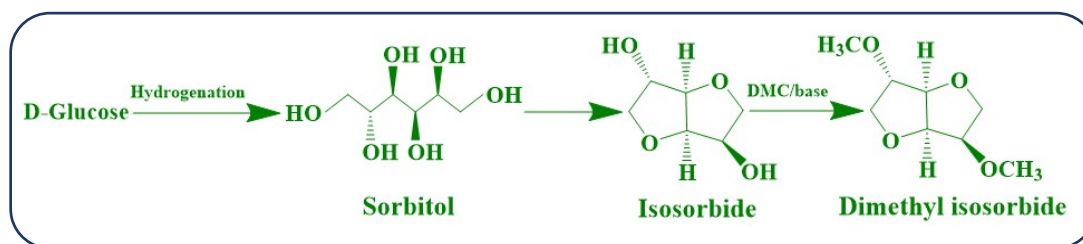Fig. S1 Chemical structure of DMI and its traditional synthesis from sugar<sup>7</sup>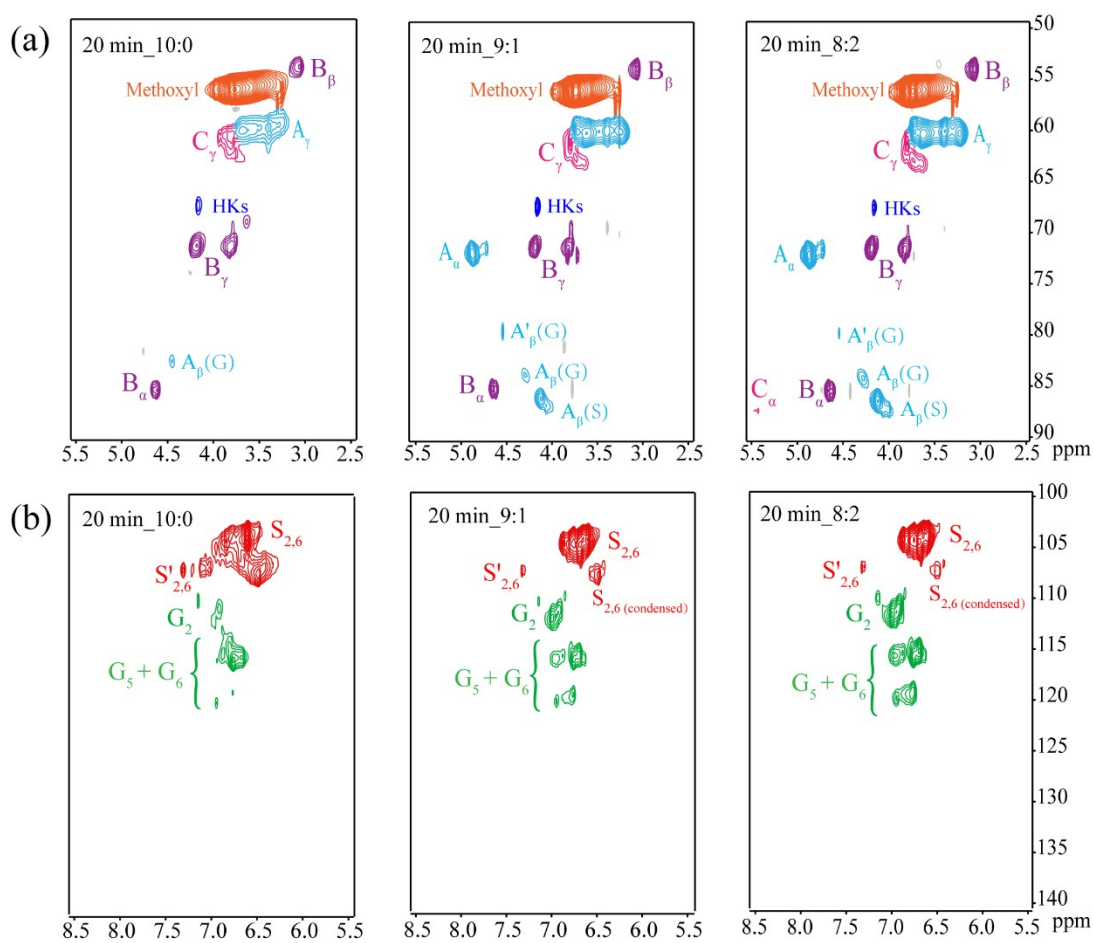

Fig. S2 (a) Side-chain regions and (b) aromatic region in the 2D HSQC NMR spectra of DMI lignin for pretreatment 20 min

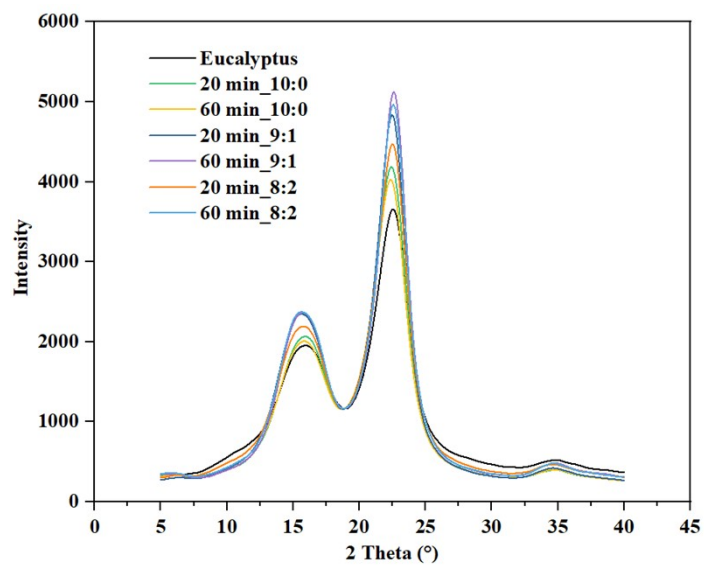

Fig. S3 X-ray diffraction of original and the pretreated substrates under different conditions

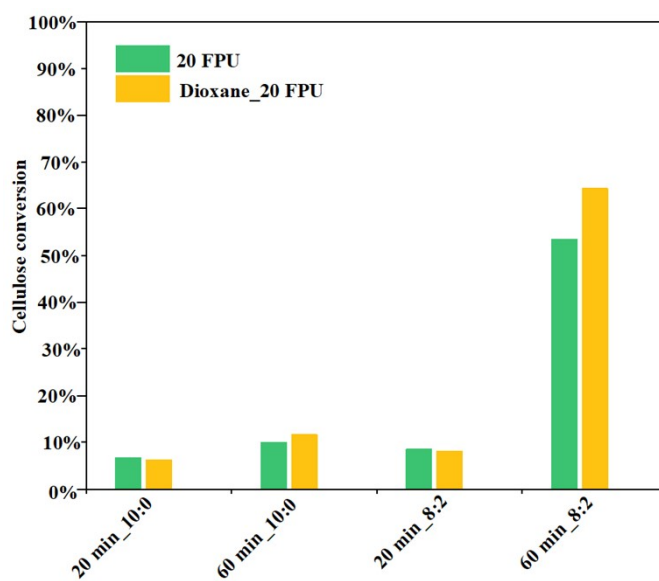

Fig.S4 Comparison of DMI/H<sub>2</sub>O (10:0) and DMI/H<sub>2</sub>O (8:2) extracted with and without 1,4-dioxane before enzymatic hydrolysis at 20 FPU g<sup>-1</sup> glucan

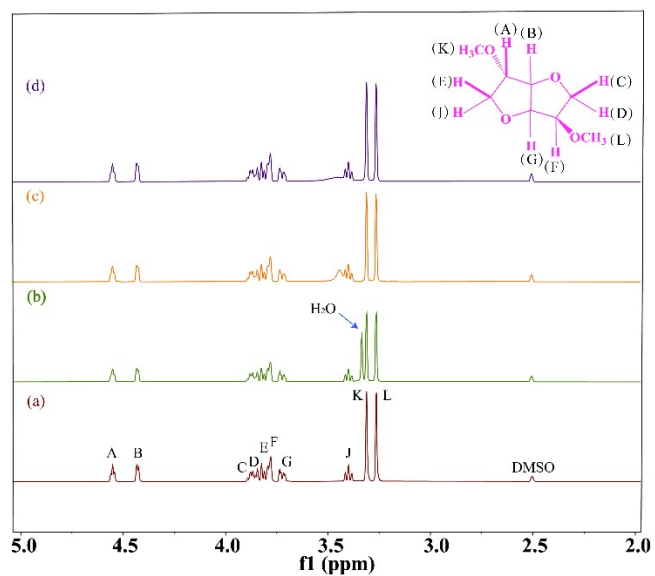

Fig.S5 <sup>1</sup>H NMR spectrum of (a) DMI at room temperature, (b) DMI/H<sub>2</sub>O (9:1) at room temperature, (c) DMI/H<sub>2</sub>O (9:1) with 75 mM H<sub>2</sub>SO<sub>4</sub> under 120 °C for 60 min, (d) *Eucalyptus* pretreated with DMI/H<sub>2</sub>O (9:1) and 75 mM H<sub>2</sub>SO<sub>4</sub> under 120 °C for 60 min

# Full NMR Spectra:

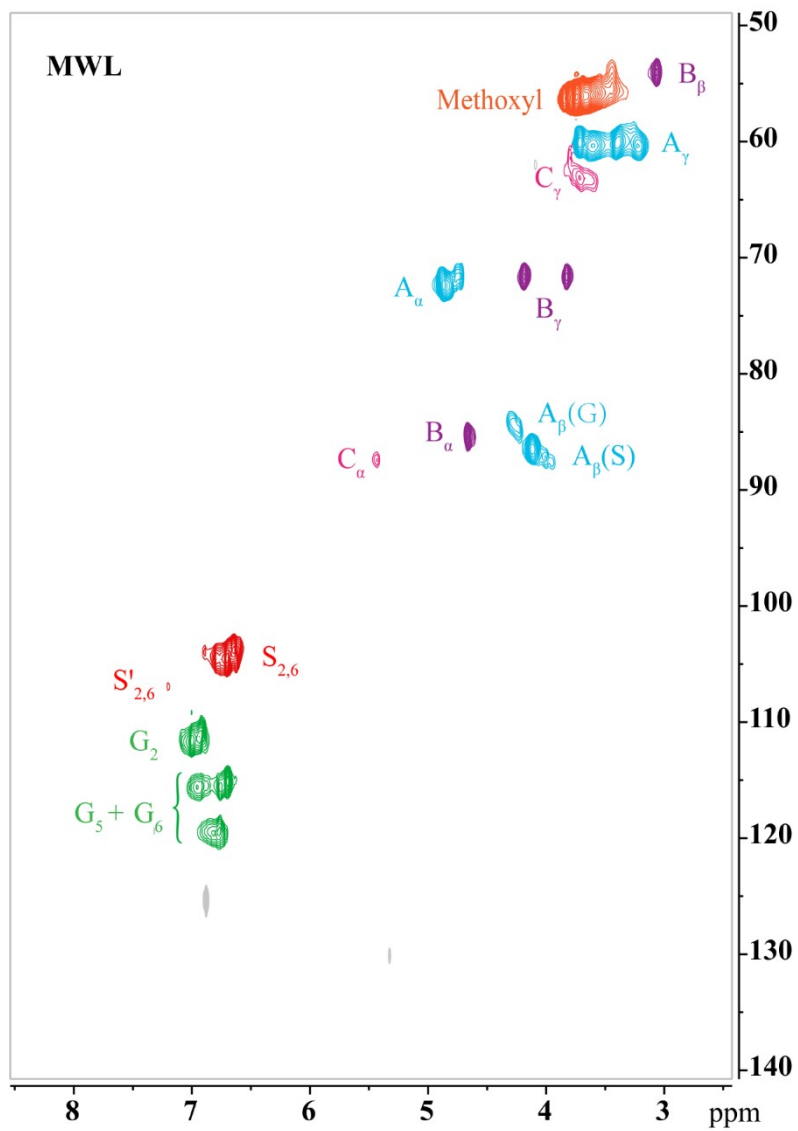

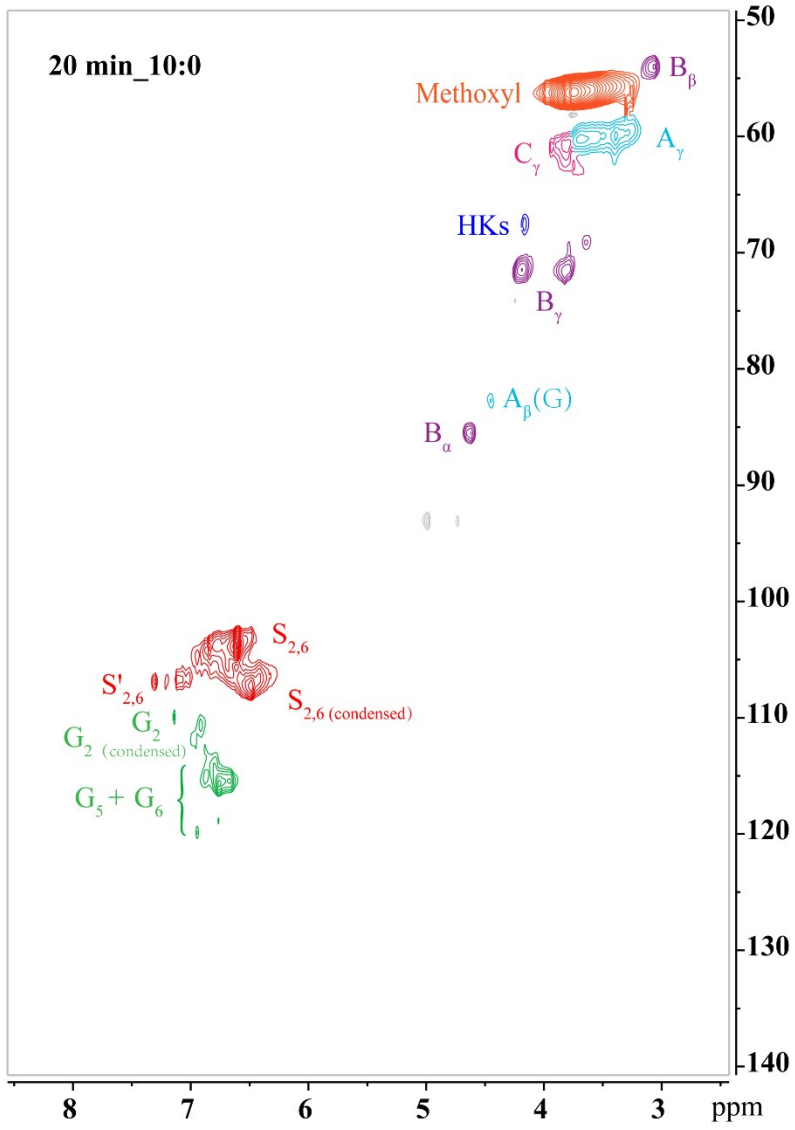



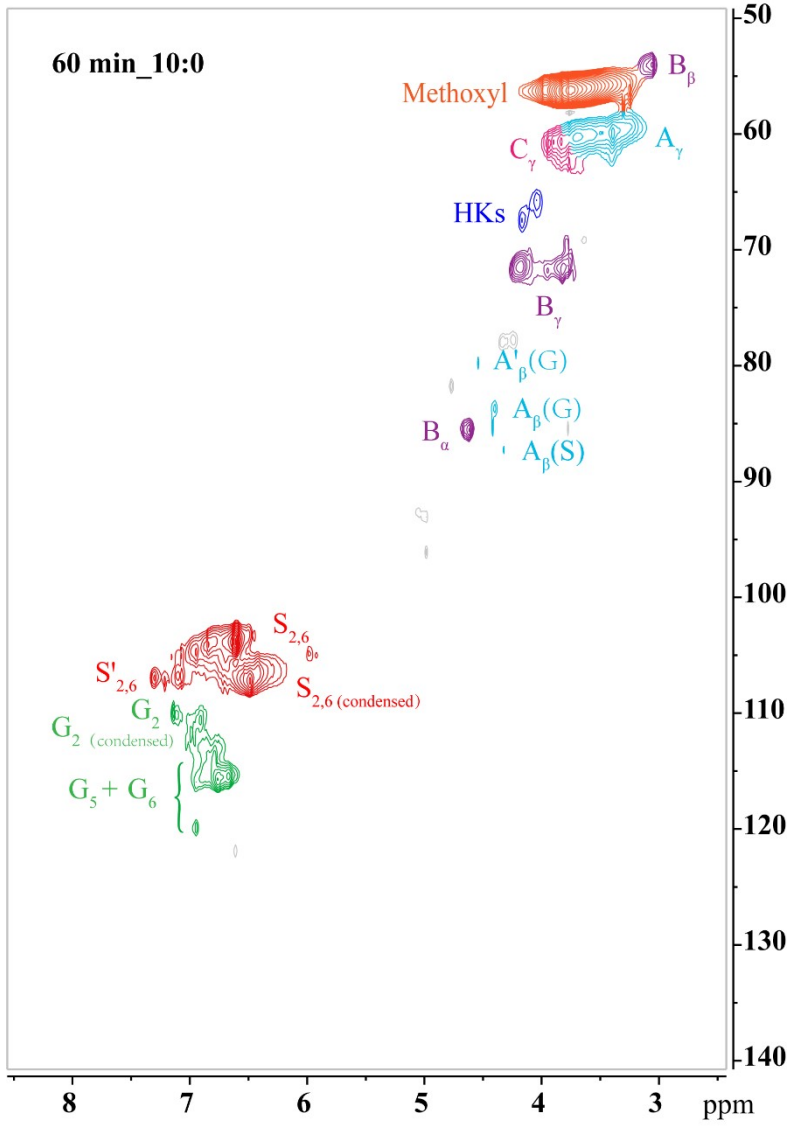

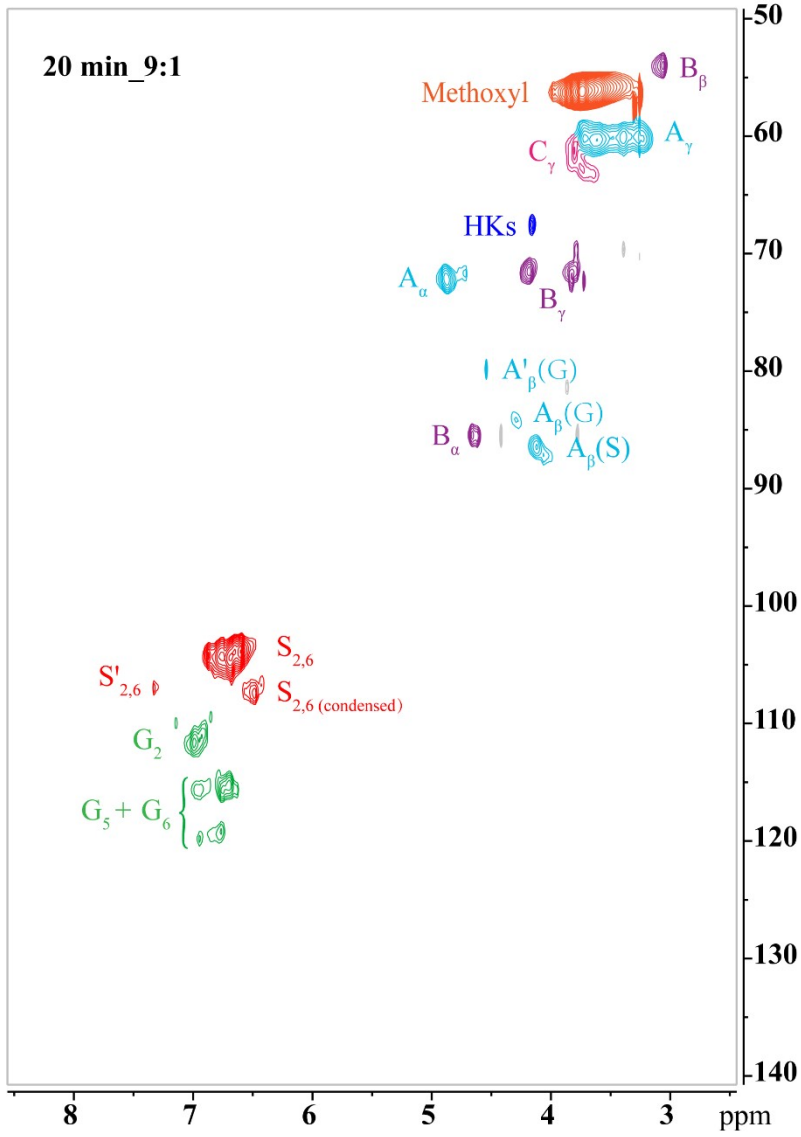

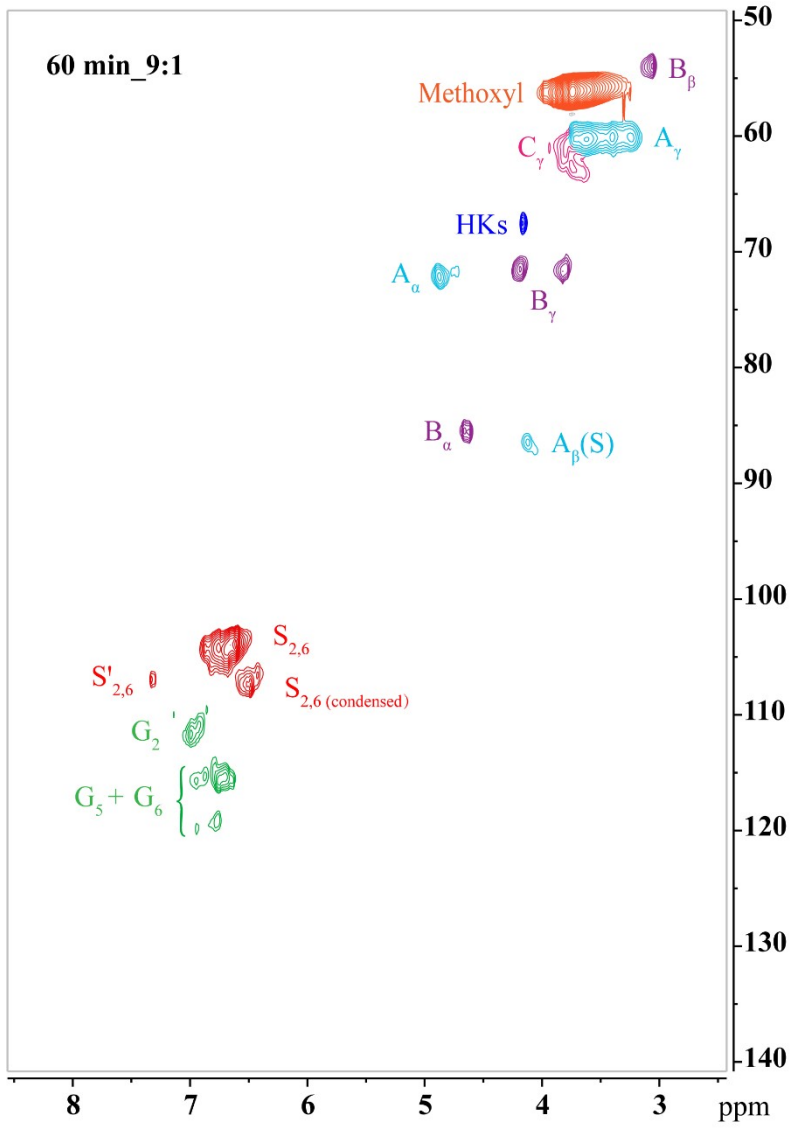

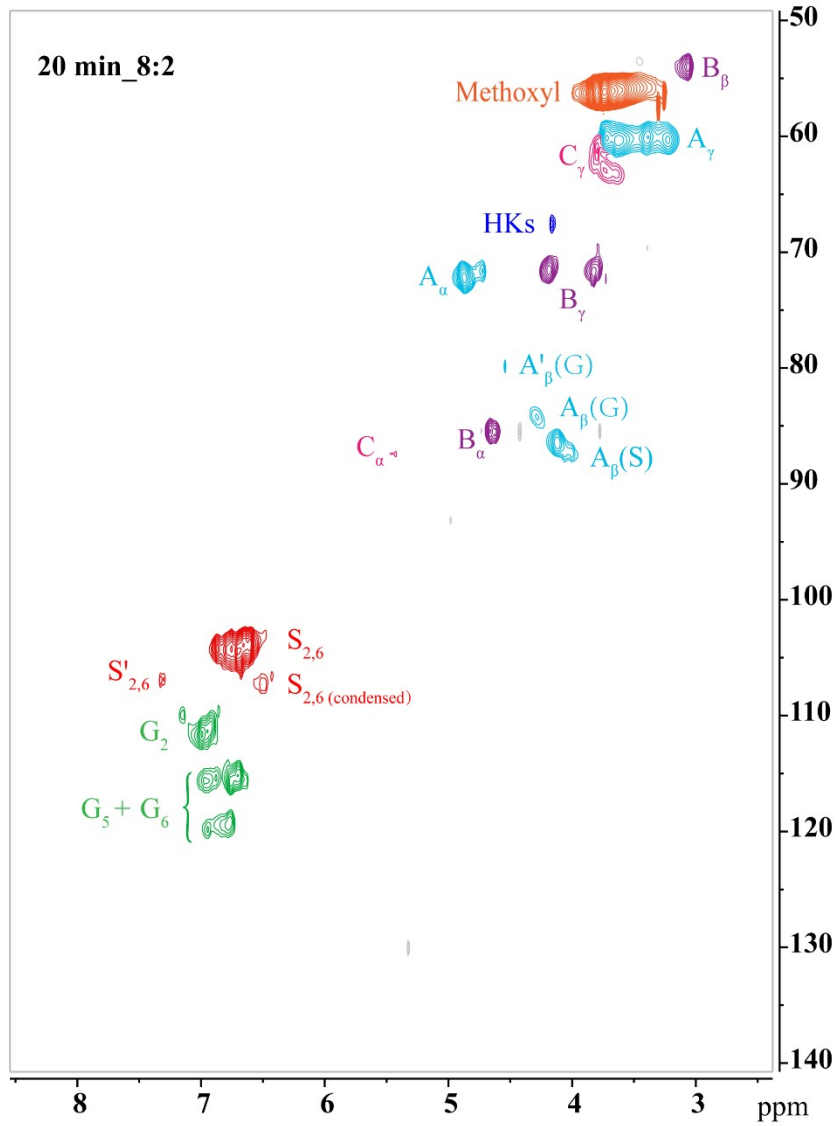

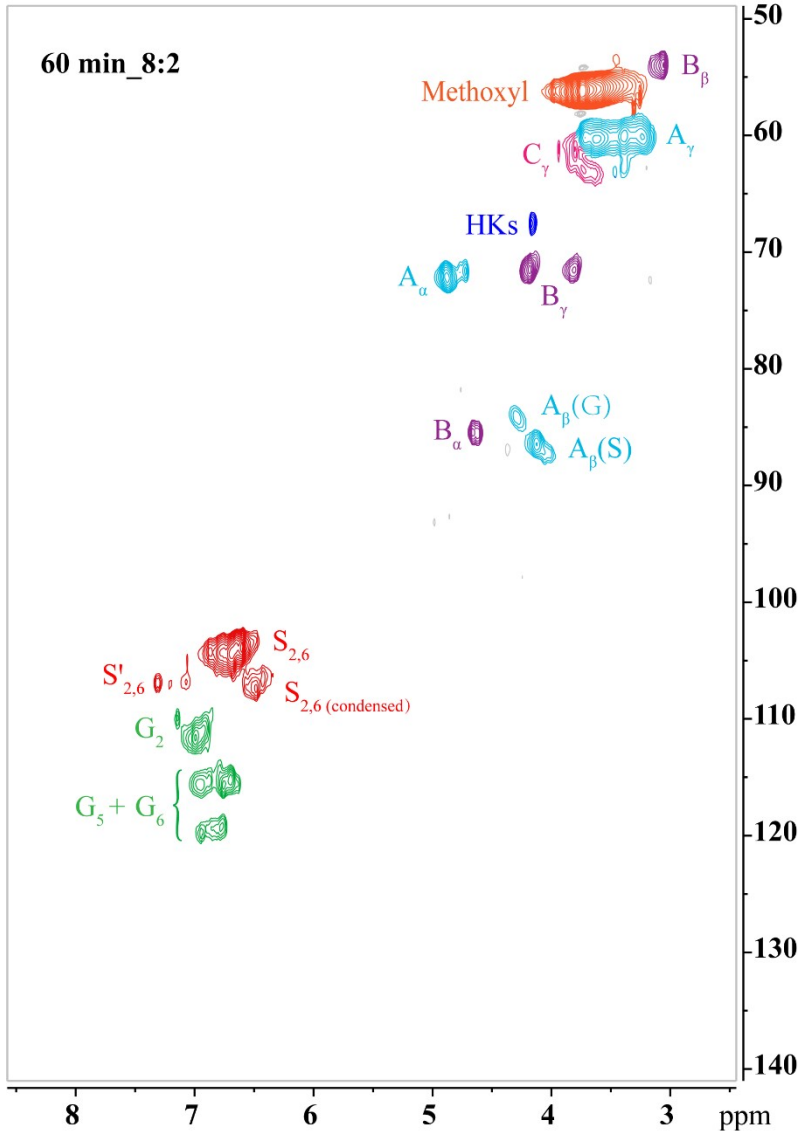

## References

1. A. D. P. Sánchez-Camargo, M. Bueno, F. Parada-Alfonso, A. Cifuentes and E. Ibáñez, *TrAC Trends in Analytical Chemistry*, 2019, **118**, 227-237.
2. C. Dong, X. Meng, S. Y. Chi, H. Y. Tse, A. J. Ragauskas and S. Y. Leu, *Green Chemistry*, 2019, **21**, 2788-2800.
3. Q. Zhang, X. Tan, W. Wang, Q. Yu, Q. Wang, C. Miao, Y. Guo, X. Zhuang and Z. Yuan, *ACS Sustainable Chemistry & Engineering*, 2019, **7**, 8678-8686.
4. W. C. d. Ribeiro, V. Lobosco and P. F. M. Martinez, *Bioresources*, 2020, **15**, 8577-8600.
5. C. M. Hansen, *Hansen Solubility Parameters: A User's Handbook*, Hansen solubility parameters : a user's handbook, 2007.
6. C. Dong, X. Meng, C. S. Yeung, H.-Y. Tse, A. J. Ragauskas and S.-Y. Leu, *Green Chemistry*, 2019, **21**, 2788-2800.
7. F. G. Calvo-Flores, M. J. Monteagudo-Arrebola, J. A. Dobado and J. Isac-García, *Topics in Current Chemistry*, 2018, **376**, 18.
